# Supplementary material for: Temporal regulation of proteome profile in the fruit fly, Drosophila melanogaster
Source: PeerJ. 2016 May 24;4:e2080. doi: 10.7717/peerj.2080 (PMC4888302; doi:10.7717/peerj.2080)
Supplement: Table S1 — Percentage of volume contribution of protein spots/clusters of Drosophila melanogaster. [file peerj-04-2080-s001.xlsx]

## Sheet: Sheet1
Temporal regulation of proteomic proflie in the fruit fly, Drosophila melanogaster'
Perumal Subramanian, Jaime Jacqueline Jayapalan, Puteri Shafinaz Abdul-Rahman, Manjula Arumugam and Onn Haji Hashim
Supplemental Table 1 - Percentage of volume contribution of protein spots/clusters of Drosophila melanogaster
The number and name of protein spot are mentioned in the Table.					he Table
The significant p values are given in yellow shade
Spot 12	6-phosphofructokinase
	04:00:00		08:00:00		12:00:00		16:00:00		20:00:00		00:00:00
97606	0.000223365			97608	0.0172148	97614	0.000144707	97604	0.000221701		0.000349798
	0.00767654				0.00606638		0.00166958		0.000225279		0.00564
	0.0304529				0.0150432		0.00677448		0.00679208		0.00043
	0.0081496				0.0341097		0.0086623		5.32867e-05
	0.00523662				0.0129933		0.0080363		0.000179457
	0.00589047			97609	0.0149042		0.00439362		0.00395121
97603	0.00172124				0.0227919		0.0172831		0.00508323
	0.0101926				0.0194783		0.00858893		0.000108226
	0.0405415				0.0142556		0.00958203	97601	0.00141207
	0.0295104				0.00616641				0.00605492
	0.0273838			97610	0.00136433				0.00996134
	0.0376707				0.00206117				0.0067599
	0.0182376								0.00242264
	0.0133464								0.00019177
	0.0156403								0.00546932
									0.0080812
									0.00680455
									0.000185051
Mean	0.0167916				0.0138708		0.00723723		0.00355318		0.0029949
SD	0.017975				0.00929972		0.00500646		0.00335647		0.00374074
														20 vs. 12	0.000170901
4 Vs. 12	0.522668											4 vs. 00	0.171668	20 vs. 16	0.0314837
4 Vs. 16	0.0502051													20 vs. 0	0.827067
4 Vs. 20	0.000263694
Spot 25	Succinate dehydrogenase
	4		8		12		16		20		0
97606	0.0196352			97608	0.0546545	97618	0.00563882	97604	0.0397091		0.000612442
	0.0424423				0.0232022		0.006519		0.000243023		0.0003
	0.0715318				0.0180027		0.010696		0.0578213		0.00021
	0.0495326				0.0373494		0.0146726		0.0083312
	0.140299				0.0209355		0.0116558		0.0122834
	0.0723448			97609	0.0107041		0.0193236		0.0214385
	0.0932573				0.0027902		0.0321126		0.00534096
	0.0358313				0.0100537		0.0396454		0.0469115
97603	0.0153134				0.0366484		0.000803066		0.0603262
	0.0187467			97610	0.0291781	97614	0.00949894		0.0340223
	0.021705				0.0506393		0.0111265		0.017476
	0.0812799				0.0392135		0.00645583		0.0130335
	0.0747004				0.0192819		0.0050369	97601	0.0128211
							0.00390573		0.0193903
							0.00373707		0.0336199
							0.00405474		0.0518836
Mean	0.0566631				0.027781		0.0115552		0.0271657		0.000374147	20 vs. 12	0.995444
SD	0.036697				0.0158326		0.0106685		0.0194187		0.000211219	20 vs. 16	0.0129179
4 vs. 12	0.0135633											20 vs. 0	0.0320917
4 vs. 16	6.89295e-05
4 vs. 20	0.00980128
4 vs. 0	0.05593
Spot 31	Heat shock 82 kDa protein
	4		8		12		16		20		0
97606	0.0143161			97608	0.00830329	97618	0.00066617	97604	0.000212094
	0.00738924				0.0172504		0.00113413		0.000170339
97603	0.0189427				0.0148316		0.000434778		0.00485496
	0.0424399				0.00818732		0.00100709		0.00100912
				97609	0.0183215	97614	0.000116838		0.000608148
					0.00601107				0.00111366
					0.0237122			97601	0.00199791
				97610	0.00477171				0.000309663
					0.0110881				0.000606824
					0.0123528				0.000255004
Mean	0.020772				0.012483		0.000671801		0.00111377
SD	0.0152055				0.00603382		0.00041544		0.0001429
4 vs. 12	0.154725											20 vs. 12	1.70876e-05
4 vs. 16	0.0197009											20 vs. 16	0.517009
4 vs. 20	0.00100711
Spot 32	N-glycanase
	4		8		12		16		20		0
97606	0.0193308			97608	0.0118055	97618	0.00247112	97604	0.000388281
	0.0223326				0.0193609		0.00375726		0.00411822
	0.0680938				0.0506679		0.0014421		0.037142
	0.019354				0.0427643		0.00244162		0.0213498
	0.0862491				0.0249987	97614	0.000104675		0.00421719
97603	0.0541543				0.0123429		0.000222355		0.0126519
	0.0774791			97609	0.0157797		7.96862e-05		0.00533957
	0.026913				0.0426895		0.000418392		0.000217288
	0.0689106				0.0292367		0.000241473		0.000262856
					0.0287962		0.000121379		0.0353091
					0.0260058				0.0231733
				97610	0.0136868				0.00467873
					0.0127004				0.0107668
					0.0236902				0.000606824
					0.0345785				0.00146079
									0.000717877
									5.44846e-05
									0.000241944
									0.000330536
									0.000135854
									8.0017e-05
									0.000512411
									0.000807932
Mean	0.0492019				0.0259403		0.00113001		0.00715494
SD	0.0272578				0.0123383		0.0001325		0.0011048
4 vs. 12	0.00870242											20 vs. 12	2.50213e-05
4 vs. 16	3.26604e-05											20 vs. 16	0.105626
4 vs. 20	6.7294e-07
Spot 38	Mitosis initiation protein fs(1)Ya
	4		8		12		16		20		0
97606	0.0154377	97608	0.000550892	97608	0.00517206		0.0160155		0.0478012		0.00241483
	0.0331487		2.38287e-05	97609	0.00319926		0.0118884		0.0123628		0.0013
	0.00985412	97611	9.77839e-05		0.00157693		0.00480603		0.0311107		0.007
97603	0.0175188		0.0017762				0.00334631		0.00261643
	0.000303463		0.000535669				0.021045		0.00270856
	0.0114649		0.0016897				0.0188074		0.00569264
	0.0302141						0.0160155		0.00301756
	0.000212853						0.0118884		0.00482268
									0.00416449
									0.000569599
Mean	0.0147693		0.000779012		0.00331608		0.0129766		0.0114867		0.00357161
SD	0.0121924		0.000770632		0.00180041		0.00631818		0.0155737		0.00302094
4 vs. 8	0.016715									20 vs. 16	0.803341
4 vs. 12	0.151219									20 vs. 12	0.397783
4 vs. 16	0.717462									20 vs. 8	0.119248
4 vs. 20	0.632469									20 vs. 0	0.413444
4 vs. 0	0.161618
Spot 41	Maltase H
	4		8		12		16		20		0
	0.0146995		0.0215163		0.0864855		0.0289634		0.000106083		0.000759067
	0.0675656		0.0633039		0.0289099		0.00330847		0.00114376		0.0016856
	0.0482016		0.025688		0.0187491		0.00569204		0.0522596		0.000213886
	0.0183776		0.011336		0.0123985		0.0289634		0.0177515		0.000248472
			0.0122413		0.00837017				0.0371108		0.00183396
			0.0409899		0.0272386				0.0212969		0.000111949
			0.0160816						0.0177767		0.000373162
			0.191691						0.0148431		0.000377713
									0.0311107		0.000123781
									0.00191648		0.000107398
Mean	0.0372111		0.047856		0.0303586		0.0167318		0.0195316		0.000583499
SD	0.0251903		0.0606762		0.0286458		0.0141573		0.0169028		0.000650207
20 vs. 16	0.775984											4 vs. 12	0.708548
20 vs. 12	0.353215											4 vs. 16	0.20613
20 vs. 8	0.175153											4 vs. 8	0.747891
20 vs. 4	0.147699											4 vs. 0	0.000359443
20 vs. 0	0.00232739
Spot 42	Heat shock 70 kDa protein
	4		8		12		16		20		0
	0.0518522		0.00271373		0.037497		0.011515		0.032845		0.000807305
	0.0717751		0.0012		0.0241092		0.0229585		0.028239		0.0181849
	0.0417274		0.0023		0.00901784		0.00605496		0.0100944		0.0275139
	0.0442801				0.0545412		0.00514378		0.00031518		0.00053881
	0.0473803				0.0175937		0.00229619		0.0281616		0.0338449
	0.0572817				0.0411942				0.0339593		0.0119403
					0.0350263						0.000352229
					0.0250207						0.000499673
											0.000159146
											0.000147739
											0.000303128
											8.91622e-05
											0.000146529
											0.000216513
											0.000241835
											7.96785e-05
											0.000118369
											0.000121168
											0.000199843
											0.000321763
											0.000456926
											0.000308519
											0.000114315
											6.61406e-05
											0.000351679
											0.000117659
Mean	0.0523828		0.00207124		0.0305		0.00959369		0.0222691		0.00374008
SD	0.010996		0.000782363		0.0014446		0.00818363		0.0137773		0.0008976
4 vs. 8	0.000121303											20 vs. 8	0.0440074
4 vs. 12	0.00938676											20 vs. 12	0.303303
4 vs. 16	5.21075e-05											20 vs. 16	0.105365
4 vs. 20	0.00187403											20 vs. 0	0.000277113
4 vs. 0	1.62098e-08
Spot 43	Heat shock 70 kDa protein
	4		8		12		16		20		0
	0.0237844		0.00247558		0.0415315		0.0416979		0.0336554		0.000789101
	0.0242944		0.00275065		0.0232119		0.0100583		0.028351		6.00701e-05
	0.0219656		0.00188996		0.09746		0.000349374		0.00354869		7.91832e-05
	0.0888165		0.011336		0.050932		0.00980363		0.0498042		3.09451e-05
	0.166272		0.0122413		0.0176814		0.00608713		0.0183218		0.0002421
	0.0194113		0.0409899		0.0306549		0.00540196		0.0256583		0.00392276
	0.0088877		0.0160816		0.0815314		0.00328178		0.0256168		4.27771e-05
	0.0789848		0.191691		0.0373606				0.0329977		0.00131517
	0.0913061				0.0264229				0.0214835		0.00110584
	0.0224712				0.0195969				0.00348637		0.000170198
	0.0512733				0.0750214				0.00763945		0.00145442
	0.00534454				0.0295824				0.0012993		0.00220075
					0.0212761				0.00570171		0.000666231
					0.0166603				0.0101056		0.000195683
					0.0166323				0.000284959		0.00156
					0.0434085				0.000311366		0.000132882
					0.102989				0.00299767		6.18904e-05
											0.00884928
											0.0121233
											0.000172019
											0.000350408
											0.00017657
											0.00065986
											0.000224808
											0.00328747
											0.000564295
											0.0012997
											0.0112208
											0.000567935
											0.0028506
											7.46326e-05
											0.00107216
											0.000186581
											0.000139253
											3.18553e-05
											0.00106397
											0.000494212
											0.000209335
											0.000129482
											0.0003315
											0.000179872
											0.000101405
											0.000219355
											0.000195247
											0.000464281
											0.000610975
											0.000256835
											0.000221778
											0.000277932
											8.10564e-05
											0.000178325
											0.000236319
											0.000658152
											0.000151418
											0.000220232
											0.000232684
											0.000200262
											0.000105415
											7.45804e-05
											0.000150039
											9.91069e-05
											0.000600031
											0.000661701
											0.000104706
											0.000370605
											0.000160066
Mean	0.0502343		0.034932		0.0430561		0.0109543		0.0159567		0.00101398
SD	0.0477541		0.0646064		0.0287447		0.013983		0.0148275		0.00228576
4 vs. 8	0.549238
4 vs. 12	0.617337											20 vs. 8	0.252755
4 vs. 16	0.0508131											20 vs. 12	0.00157434
4 vs. 20	0.009477											20 vs. 16	0.453662
4 vs. 0	0.0087018											20 vs. 0	8.95e-06
Spot 44	Vacuolar ATP synthase catalytic subunit A
	4		8		12		16		20		0
	0.000738163		0.00360484		0.00736117		0.00536121		0.0579072		0.0098706
	0.033552		0.00648259		0.0269096		0.000588119		0.0211257		0.00171746
	0.0424135		0.00452376		0.0787669		0.0286276		0.0152024		0.010546
	0.0731672		0.011336		0.031143		0.00727103		0.0186697		0.000532439
	0.0349204		0.0122413		0.00303286		0.000178535		0.00387288		0.00860913
	0.0293336		0.0409899		0.0420175		0.0286276		0.0477397		0.0527733
	0.00398783		0.0160816		0.0495622				0.0308491		0.0233562
			0.191691		0.104093				0.020151		0.0352685
					0.00461587				0.0294559		0.000108308
					0.00505151				0.0195704		0.000405035
					0.0338456				0.0502444		0.000119957
					0.0440613						8.46499e-05
					0.102829						9.46358e-05
											8.93719e-05
											0.000129482
											0.0003315
											0.000179872
											0.000219355
Mean	0.031159		0.0358689		0.0410223		0.0117757		0.0286171		0.00802421
SD	0.0244208		0.0640819		0.0351777		0.0133347		0.0167267		0.00147565
4 vs. 8	0.858002
4 vs. 12	0.51915											20 vs. 8	0.721586
4 vs. 16	0.111765											20 vs. 12	0.296598
4 vs. 20	0.79564											20 vs. 16	0.0514203
4 vs. 0	0.00771779											20 vs. 0	0.00177308
Spot 46	Heat shock 60 kDa protein
	4		8		12		16		20		0
	0.0567349		0.0179249		0.0365878		7.85135e-05		7.85135e-05		0.0282173
	0.0577522		0.00849082		0.0203453		0.0716918		0.0716918		0.0271069
	0.0495437		0.0150473		0.00962059		0.0208209		0.0208209		0.0337449
	0.0107622		0.00232274		0.0607549		0.0178308		0.0178308		0.000377713
	0.0984679		0.0570091		0.0335361		0.0411113		0.0411113		0.0231943
	0.0267298		0.000575152		0.0119106		0.065834		0.065834		0.0217225
	0.108229		0.0289519		0.0535656		0.02449		0.02449		0.0219447
			0.00433297		0.0268076		0.0128028		0.00449714		0.00133243
			0.0202441		0.0100588		4.46836e-05		0.00123412		0.000457972
			0.00841003				0.000201021		0.0188736		0.000330703
			0.0292796				0.0105108		0.000395074		0.000293017
							0.0117235		0.0171284		0.000296108
							0.00303835		0.000244091		0.000489058
							0.00725658		0.0106347
									0.0155735
									0.00376981
									0.00757991
									0.000647803
									0.00360416
									0.00240356
Mean	0.0583171		0.0175081		0.029243		0.0205311		0.0164222		0.0122698
SD	0.0352191		0.0164273		0.0186934		0.0233495		0.0020824		0.00135605
4 vs. 8	0.00404464											20 vs. 8	0.882622
4 vs. 12	0.0510687											20 vs. 12	0.125758
4 vs. 16	0.00819014											20 vs. 16	0.593767
4 vs. 20	0.000807721											20 vs. 0	0.530133
4 vs. 0	0.000489918
Spot 50	Protein disulfide isomerase
	4		8		12		16		20		0
	0.0346319		0.0155173		0.0145687		0.010786		0.0716665		0.000143804
	0.124939		4.87215e-05		0.0177199		0.0097458		0.0258075		4.82381e-05
	0.0159427		0.00286816		0.0123		0.0323966		0.000252857		0.000130152
			0.00254383				0.0161288		6.33449e-05		0.000163827
							0.0215272		0.00150473		0.000163827
							0.00147206		0.00809701		0.000113769
							0.00412594		0.0029681		0.0019095
									0.00399576		8.00935e-05
											0.00995347
											0.00355779
											0.00186945
											0.000729942
											0.00208425
											0.060274
											0.019953
											0.000655476
											0.0221407
											0.00179236
Mean	0.0585045		0.0052445		0.0148629		0.0137403		0.0142945		0.00698687
SD	0.00582879		0.00696341		0.0027219		0.0106617		0.0246696		0.0014892
4 vs. 8	0.120152
4 vs. 12	0.264878											20 vs. 8	0.497444
4 vs. 16	0.0666292											20 vs. 12	0.970112
4 vs. 20	0.0953189											20 vs. 16	0.957043
4 vs. 0	0.00237716											20 vs. 0	0.356492
Spot 51	Vacuolar ATP synthase catalytic subunit B
	4		8		12		16		20		0
	0.0217988				0.0744287		0.0577281		0.0669225		0.0399469
	0.063613				0.0294609		0.0367085		0.0204965		0.0026358
	0.162276				0.0525337		0.00613462		0.0636422		0.058906
	0.0152359				0.107883		0.00754839		0.0342728		0.0713626
	0.0970436				0.0389728		0.0367085		0.0636422		0.0673834
	0.123023				0.0991478		0.0244348		0.0342728		0.0032002
											0.0023415
											0.0006734
											0.00454579
											0.00400935
											0.00404436
											0.0180699
											0.00164257
											0.00203173
											0.0219049
											0.000776392
											0.000273505
											0.000306597
											0.000254912
											0.00067599
											0.00030409
											0.000559125
											0.00360821
											0.00134964
Mean	0.0804984				0.0670712		0.0282105		0.0472082		0.0129503
SD	0.0578958				0.0321373		0.0197192		0.0198845		0.0022438
4 vs. 12	0.63014
4 vs. 16	0.0626964											20 vs. 12	0.0019853
4 vs. 20	0.212393											20 vs. 16	0.127556
4 vs. 0	7.18344e-05											20 vs. 0	0.0019853
Spot 54	Calreticulin
	4		8		12		16		20		0
	0.00310712		0.0945274		0.0467307		0.0290559		0.0948149		0.000232999
	0.000999061		0.0704295		0.0770806		0.0385809		0.14002		0.00101573
	0.00298832		0.064		0.0485509		0.0101316		0.14002		0.118243
	0.000214209										0.0113418
	0.000218941										0.00176658
	0.0197667										0.00299171
	0.0999305										0.000122003
	0.0701078										0.000303462
	0.012642										0.000771294
	0.197762										0.00800823
	0.16984										0.00319953
	0.149301										0.00937666
	0.094444
Mean	0.0631786		0.076319		0.0574541		0.0259228		0.124952		0.0131144
SD	0.0723115		0.0160933		0.0170214		0.0144811		0.0260992		0.003333
4 vs. 8	0.764716
4 vs. 12	0.896174											20 vs. 8	0.0515235
4 vs. 16	0.401122											20 vs. 12	0.0199126
4 vs. 20	0.176014											20 vs. 16	0.00454503
4 vs. 0	0.038887											20 vs. 0	0.000129815
Spot 55	Tubulin β-1 chain
	4		8		12		16		20		0
	0.000737875		0.000109827		0.198909		0.0208182		0.00013249		0.000606161
	0.00672971		0.0059419		0.0973737		0.0429472		0.00356596		0.00206968
	0.00334226		0.00221682		0.00294525		0.120675		0.0196918		0.000504225
	0.00227088		0.00122579		0.00545555		0.026174		0.00182148		0.00181029
	0.000146395				0.000497212		0.0827611		0.00221547		0.000336756
	0.000123253				0.0132542		0.0429472		0.00222093		0.000182941
	0.000223535				0.0581096		0.120675		0.0022183		0.00151722
	0.00158954				0.0486969				0.000764575		0.00323377
	0.0033073				0.00142006				0.0393036		0.00409568
	0.00610261				0.00282212				0.039978		0.00162735
	0.000354501				0.013395				0.0920846		0.00198231
	0.00492345				0.00652061				0.039978
	0.0717591				0.0103337				0.0441458
	0.0474816				0.0075544				0.0192974
	0.0314975				0.00317955				0.0323886
	0.0152658				0.0305135
	0.0206038
	0.0063548
	0.00106463
	0.0030617
	0.0419121
	0.0794388
Mean	0.0158314		0.00237358		0.0313113		0.0652854		0.0226538		0.00163331
SD	0.00236994		0.00252979		0.0520638		0.0042713		0.0257908		0.00122867
4vs. 8	0.275504
4 vs. 12	0.225103											20 vs. 8	0.142399
4 vs. 16	0.000537001											20 vs. 12	0.566195
4 vs. 20	0.412343											20 vs. 16	0.00834807
4 vs. 0	0.0578443											20 vs. 0	0.0129112
Spot 57	Actin-87E
	4		8		12		16		20		0
	0.118216		0.12639		0.0761145		0.00955576		0.00157933		5.916e-05
	0.0019089		0.0455283		0.459293		0.00707483		0.0213049		0.000343127
	0.111947		0.00091218		0.211948		0.0341607		0.000977595		4.27772e-05
	0.0675026				0.0533074		0.0633543		0.00244131		0.000348589
	0.0192678				0.00148676		5.47356e-05		0.000555369		0.000459626
	0.149096				0.00981259		0.000611739		0.0536992		0.0899042
	0.000786306				0.00225354		0.000257613		0.174417		0.295871
	0.0025284				0.0168312		0.0137754		0.249742		0.101515
	0.0241183				0.000788037		0.00067471		0.0297696		0.24022
	0.0458737				0.00304121		0.000345285		0.0514881		0.215269
					0.0608155		0.168282		0.156105		0.00547506
					0.101825		0.166924		0.293647		0.108796
					0.22034		0.179399		0.0433592		0.00445892
					0.426421		0.00202827		0.0183237		0.0013254
					0.000372197		0.153406		0.0514881		0.122952
					0.00310507		0.247303		0.156105		0.107253
					0.000232304				0.293647		0.00525525
					0.000264026				0.0211807		0.0267795
					0.000166015						0.100464
					0.00292513						0.0183519
					0.000910811
					0.000359464
					0.0016428
					0.0837583
					0.0488882
					0.272652
					0.156519
Mean	0.0541245		0.0576102		0.0820768		0.0654505		0.0899906		0.0722572
SD	0.0548399		0.0636054		0.129456		0.0856487		0.103018		0.0903897
4 vs. 8	0.927063
4 vs. 12	0.515698											20 vs. 8	0.608187
4 vs. 16	0.713353											20 vs. 12	0.829031
4 vs. 20	0.318072											20 vs. 16	0.45893
4 vs. 0	0.566401											20 vs. 0	0.575395
Spot 59	Actin-88F
	4		8		12		16		20		0
	0.0073033		0.049625		0.104032		0.0538077		0.00774998		0.000253932
	0.0115537		0.0424582		0.0859674		0.0582424		0.00154568		7.00814e-05
	0.0154663		0.0482397		0.0916348		0.0285844		0.0931151		0.000156546
	0.0257363		0.000758737		0.0798555		0.00279452		0.0723239		0.000101937
	0.0143998		0.000669115		0.0584309		0.00279044		0.136823		0.000445019
	0.0124853		0.129018		0.145835		0.0382921		0.0232026		3.64063e-05
	0.00779559		0.0688469		0.0367876		0.00380753		0.0149755		0.000415939
	0.000754082		0.0617528		0.0539111		0.000465508		0.0283307		0.00107944
	0.0154749		0.167432		0.187539		0.00178239		0.0125723		3.0035e-05
	0.0286053		0.00958681		0.500632		0.00278644		0.00453139		0.000109218
	0.0461492		0.00164858		0.346656		0.0160287		0.0187389		1.72931e-05
	0.0182973		0.0343061		0.313596		0.00384392		0.0569493		0.000381354
	0.0313302		0.106666		0.341789		0.00247517		0.0125054		3.73162e-05
	0.0218018		0.136801		0.127368		0.0087352		0.0124332		1.72929e-05
	0.0186522		0.237966		0.0387253		0.00460098		0.000153848		0.00245013
	0.0759277		0.0976807		0.00740194		0.0200237		0.000378455		8.28241e-05
	0.00143399		0.0365758		0.00442402		0.000283711		0.00062502		0.000351319
	0.0176577		0.00547073		0.00622903		0.00207719		0.00340775		6.55312e-05
	0.000251694		0.00150359		0.00398425		0.0215318		0.00400408		6.09794e-05
	0.00421361		0.011125		0.000310535		0.00342066		0.00414628		0.000139253
	0.00336008		0.113713		0.000861613		0.00638311		0.000775309		0.000131972
	0.00931876		0.00112447		0.00374659		0.0218084		0.00102899		5.73396e-05
	0.000326612		0.00383057		0.00420958		0.00510908		0.000799754		0.000202054
	0.000130746		0.000699357		0.000704051		0.00161282		0.0229623		0.00735858
	0.000636713		0.0296589		0.00437514		0.0015209		0.00626079		1.00116e-05
	0.0349696		0.404952		0.000823031		0.00299594		0.0219168		8.46443e-05
	0.000786278		0.00803008		0.00302776		0.00343522		0.031752		2.36641e-05
	0.00150062		0.00077177		0.0022947		0.0069625		0.00101441		4.73278e-05
	0.000548367		0.0122979		0.00120492		0.00191548		0.00126411		4.00466e-05
	0.00275072		0.00538603		0.0139444		0.0027301		0.00271005		2.27541e-05
	0.000527073		0.000651563		0.00041379		0.000183725		0.0124415		7.37227e-05
	0.0816068		0.000295814		0.0182307		0.00341177		0.0436978		3.91372e-05
	0.0238533		0.0716163		0.00651917		0.0255563		0.00872406		3.18557e-05
	0.00147121		0.000289819		0.0014071		0.0327702		0.00804266		1.45624e-05
	0.00388922		0.00148131		0.000465947		0.00120691		0.0146685		0.000166557
	0.0195324		0.21161		0.000152956		0.000101449		0.0347917		8.3734e-05
	0.00339618		0.154645		0.00139562		0.0018119		0.00471542		0.000398647
	0.0025382		0.1704		0.00421713		0.00048468		0.0149017		8.55543e-05
	0.0011507		0.122348		0.000682815		0.000209722		0.000990709		0.000280327
	0.00209159				0.00370032		0.00562418		0.000942378		9.82967e-05
	0.00196552				0.00535553		0.000816526		0.00189511		0.000654399
	0.0299151				0.00191529		0.000657601		0.0343788		0.000711826
	0.0871138				0.013351		0.00104221		0.00092607		8.46439e-05
	0.0112419				0.0102154		0.00162497		0.00787799		0.000232088
	0.0134355				0.0191669		0.000311657		0.046118		0.000200234
	0.0881863				0.000322672		0.00102716		0.000628581		0.00011559
	0.0508391				0.00209185		0.00209648		0.0432858		0.000150175
	0.0662664				0.00111921		0.0011041		0.00375599		0.00673422
	0.100452				0.000464637		0.000401855		0.000503336		4.91484e-05
	0.00304114				0.000406839		0.0179174		0.00194191		0.000117409
	0.00252021				0.00354076		0.000225543		0.0171444		6.91715e-05
	0.0100973				0.000802759		0.00064779		0.0288925		0.000153815
	0.0134359				0.00121031		0.00110708		0.0158741		6.28007e-05
	0.0879718				0.00220759		0.000217847		0.00115048		6.7351e-05
	0.00960593				0.00364987		0.000326727		0.000533358		0.000401378
	0.0111763				0.00245285		0.000124358		0.000829811		0.000363151
	0.000303039				0.000975861		0.00287497		0.00994528		4.00467e-05
	0.0030273				0.0113754		0.0034819		0.00156695		0.000178391
	0.0015627				0.0118543		0.000707096		0.00457279		4.73277e-05
	0.101626				0.0480127		0.000114631		0.00108048		0.00011468
	0.001196				0.0897971		0.00154607		0.000711434		3.73166e-05
	0.000342906				0.0107912		0.00138159		0.000729288		0.00386638
	0.000347918				0.00630865		0.00613391		0.00210417		0.000142894
	0.00562709				0.115119		0.000450498		0.00948109		8.4644e-05
	0.00463428				0.00259456		0.0108615		0.000479036		4.0957e-05
	0.00100488				0.010921		0.00245098		0.000368865		1.36526e-05
	0.00326343				0.00507771		0.000580135		0.00697673		0.000155636
	0.000553935				0.00448988		0.000393954		0.00493668		4.09575e-05
	0.000351314				0.00731213		0.0426252		0.0159549		3.54959e-05
	0.00866338				0.0035125		0.074428		0.000254538		0.000575216
	0.00620593				0.00547125		0.000353801		0.00788062		6.46212e-05
	0.00463461				0.0192819		0.0442765		0.00789987		8.46442e-05
	0.0111811				0.044157		0.00339899		0.000614868		8.10034e-05
	0.0321973				0.00134558		0.000287347		0.00027486		0.000136524
	0.072134				0.00623925		0.00170326		0.0536359		0.000101937
	0.00651375				0.00141705		0.000143003		0.000917932		1.09217e-05
	0.00572727				0.000236773		0.00029344		0.000712741		0.000666232
	0.0227878				0.0130571		0.00487415		0.124257		1.72928e-05
	0.00471794				0.0067347		0.0892959		0.0213577		0.000140163
	0.0270235				0.00462317		0.0666621		0.0142636		0.000232088
	0.174748				0.00643436		0.00124048		0.00179255		5.82493e-05
					0.00122881		0.0115882		0.0126752		3.36756e-05
					0.000510065		0.00019323		0.00332137		5.27885e-05
					0.0166602		0.0076375		0.00644705		5.36992e-05
					0.00134848		0.000106201		0.000748466		7.64527e-05
					0.00223772		0.0191046		0.000323062		5.5519e-05
					0.000371851		0.067237		0.00102876		0.000143804
					0.000966685		0.099955		0.00220181		0.000136522
					0.000691675		0.054923		0.0441726		0.000174626
					0.000587081		0.225521		0.00272287		1.72928e-05
					0.00030412		0.146104		0.000789565		2.63945e-05
					0.000600835		0.210959		0.00391831		0.000463267
					0.00150705		0.0915737		0.0368903		2.91247e-05
					0.00363974		0.00401831		0.14192		0.000458717
					0.000526648		0.000210658		0.00232168		0.000110129
					0.000723362		0.00935162		0.0141857		8.82843e-05
					0.000582284		0.00143255		0.040469		3.64058e-05
					0.00198207		0.15184		0.0868987		0.000375892
					0.00079454		0.0521778		0.0308582		0.000203875
					0.000946127		0.00166025		0.0346011		9.46556e-05
					0.00100884		0.00170511		0.0810331		3.45857e-05
					0.00107839		0.0418687		0.152423		0.000129242
					0.00083905		0.0168276		0.0697162		6.09799e-05
					0.000185242		0.00692663		0.0964888		2.9125e-05
					0.00096621		0.00526789		0.000627774		0.000143804
					0.00120121		0.0283565		0.112498		0.000223904
					0.00167832		0.000679625		0.0117444		5.82493e-05
					0.00308956		0.0181713		0.000651685		8.82847e-05
					0.000967669		0.00927834		0.00293826		0.000837341
					0.000925676		0.0085086		0.0988031		5.46091e-05
					0.000609608		0.024616		0.0121324		8.37343e-05
					0.00361621		0.000341916		0.00425465		4.0957e-05
					0.000927284		0.000217238		0.00207155		1.63828e-05
					0.0022986		0.00425884		0.000789623		0.00029762
					0.01235		0.00148823		0.000538977		0.000609769
					0.0309032		0.0112857		0.00700563		1.45624e-05
					0.00103618		0.00173431		0.000324236		5.27883e-05
					0.00122595		0.000146789		0.000508846		5.18783e-05
					0.00255867		0.000430819		0.00456545		8.46442e-05
					0.00356238		0.0507775		0.000686746		9.28355e-05
					0.00457328		0.00022384		0.039348		0.00059077
					0.0510259		0.00388292		0.00169088		0.193876
							0.00263276		0.00643969		2.54843e-05
							0.0027219		0.000826083		0.000185671
							0.00102877		0.000332381		8.00933e-05
							0.00592716		0.00103338		0.000323103
							0.000670432		0.00018054		4.73277e-05
							0.000478251		0.000230602		0.00137797
							0.00767547		0.000428988		0.000144714
							0.000619922		0.0009634		6.37113e-06
							0.000137928		0.0117444		0.000108308
							0.00172496		0.000155389		0.000197504
							0.00796326		0.00375036		0.0018913
							0.00132376		0.000397158		0.00511141
							0.00014628		0.0249142		3.09454e-05
							0.00568841		0.000338441		8.64644e-05
							0.000190786		0.000615589		0.000380443
							0.000361368		0.000728552		0.212707
							0.00175518		0.00256717		0.000307632
							0.0125908		0.000554358		0.000235729
							0.000180019		0.00232992		0.000137433
							0.000657295		0.00133262		0.000582499
							0.0970874		0.0120139		0.000320375
							0.00191865		0.00103678		6.28003e-05
							0.00104341		0.0038355		0.000397737
							0.000387222		0.000810541		0.00222807
							0.000270362		0.00233115		0.00314821
							0.00631207		0.000170294		0.00282873
							0.0160844		0.000579463		0.000769078
							0.0486428		0.000500368		0.0452889
							0.00299035		0.0543562		0.0201758
							0.00505199		0.00773749		0.0240103
							0.000429712		0.000388042		0.00080142
							0.000315975		0.00320927		0.0110548
							0.0105304		8.52984e-05		0.000770042
							0.0059505		0.00134952		0.0157389
							0.115543		0.000897254		0.000442805
							0.0413805		0.000991255		0.000606131
							0.182117		0.000152016		0.00185817
							0.123943		0.0144039		0.00116158
							0.0327702		0.00376794		0.00503556
							0.000450498		0.000545881		0.00833094
							0.0115882		0.000381425		0.00107329
							0.210959		0.000310826		0.00204623
									0.00856337		0.00106197
									0.000160607		0.000318839
									0.00106674		0.00878896
									0.0083044		0.00159778
									0.00293826		0.00107045
									0.00107372		0.0442626
									0.00102418		0.0130068
									0.0486195		0.000620171
									0.00159666		0.000600573
									0.0988031		0.00116091
									0.0435661		0.00178802
									0.00560408		0.000363211
											0.00532102
											0.00077568
											0.0022215
											0.0116258
											0.00292064
											0.00355318
											0.000693078
											0.00174661
											0.0128133
											0.0121332
Mean	0.0204607		0.0656906		0.0268503		0.0192393		0.0159079		0.00394275
SD	0.00313634		0.0086822		0.0730349		0.040823		0.0290928		0.00216054
4 vs. 8	5.80215e-05
4 vs. 12	0.4585											20 vs. 8	2.49139e-09
4 vs. 16	0.812967											20 vs. 12	0.073848
4 vs. 20	0.256623											20 vs. 16	0.384367
4 vs. 0	1.19281e-06											20 vs. 0	1.10467e-05
Spot 61	Enolase
	4		8		12		16		20		0
	0.0149982		0.0424803		0.129596		0.0195983		0.000385249		0.000496661
	0.0170582		0.0639472		0.235786		0.107517		0.000854057		0.00349
	0.00125562		0.0678218		0.0767836		0.0439241		0.0231745		0.00035
	0.0011821		0.0337861		0.0932647		0.281798		0.00134414
	0.027775		0.202425		0.273837		0.290466		0.00375417
	0.000322476		0.238098		0.0136957		0.0615486		0.0524451
	0.0131462		0.0322307		0.127324		0.0393121		0.0997901
	0.000938217		0.0332219		0.0374386				0.263855
	0.0705363		0.00169185		0.019032				0.0330468
	0.00577403		0.00214175		0.166679				0.128158
	0.0436856		0.000670061		0.00142432				0.00640854
	0.00270398		0.00246491		0.0435661				0.0974542
	0.00186048		0.00259262		0.0596053				0.0184038
	0.00320677		0.00160164		0.122821
	0.0569975				0.00162595
	0.0220735				0.0526317
	0.0301534				0.207094
	0.0102203				0.0239414
	0.00129882				0.0883809
	0.0137573
	0.0222538
	0.039238
	0.264781
	0.00546471
	0.0481984
	0.000142169
	0.0410979
	0.000462933
	0.133358
	0.000464096
	0.00164902
	0.00102265
	0.108261
	0.0932832
	0.00516384
	0.0802007
Mean	0.0328885		0.0517981		0.0933962		0.120595		0.0560826		0.00144555
SD	0.00521697		0.0753988		0.0805414		0.116323		0.0760412		0.00177206
4 vs. 8	0.316943
4 vs. 12	0.00139284											20 vs. 8	0.884366
4 vs. 16	0.00239662											20 vs. 12	0.19813
4 vs. 20	0.231916											20 vs. 16	0.149781
4 vs. 0	0.309148											20 vs. 0	0.245714
Spot 62	Vitellogenin-2 precursor
	4		8		12		16		20		0
	0.0485604		0.00051179		0.0815679		0.000690563		0.00207193		0.000624765
	0.0504671		0.000234192		0.0709071		0.00036615		0.00164097		0.00043
	0.0408425		0.0228633		0.0371543		0.0150562		0.0114684		0.00054
	0.0016391		0.0209721		0.088255		0.033243		0.126244
	0.00147587		0.0843066		0.0885927		0.00954931		0.028889
	0.0062723		0.0471843		0.0405055		0.00594918		0.00149063
	0.0379858		0.00911263		0.041163		0.0110285		0.059957
	0.0456543		0.124177		0.0247229		0.000468127		0.00578566
	0.00591754		0.0180777		0.0656651		0.0312728		0.00366993
	0.0495533		0.046822		0.0171744		0.157717		0.0522596
	0.0250132		0.0539636		0.0451371		0.0681447		9.50771e-05
	0.00218545		0.095536		0.00120933		0.149385		0.0177515
	0.0587734				0.00328872		0.020777		0.00437921
	0.0489758				0.0480537		0.0263457		0.000105774
	0.0187565				0.0816916		0.0289116		0.00108604
	0.0329293						0.0511789		6.17137e-05
	0.0228825						0.00198344		0.00894862
	0.00256921						0.166383		0.000324206
	0.00357889						0.0146808		0.000545417
	0.0113168								0.000130111
	0.00157762								0.000129548
	0.0042957								0.00118893
	0.174595								0.00205179
	0.0566118								0.000126842
	0.00875413								0.00100743
	0.00484862								5.82993e-05
	0.0208451								0.122952
	0.00300512								0.00145499
	0.042862								0.0371108
	0.0190378								0.0212969
	0.00594138								0.000235724
	0.00770416								0.00284201
	0.0115451								0.000989044
	0.00858066								0.0006517
	0.0115533								0.0539357
	0.0163143								0.0389738
	0.00241903
	0.00620735
	0.00640233
	0.0136595
	0.0189323
	0.0204265
	0.0237814
	0.0122871
	0.010841
	0.0430116
	0.0299286
	0.00596742
	0.00272408
	0.00689962
	0.00708321
	0.0372421
	0.00554117
	0.00372827
	0.0153881
	0.031076
	0.0196498
	0.046513
	0.0375266
	0.033012
	0.0801244
	0.000162944
	0.0770709
	0.0524583
	0.0278834
	0.0254545
	0.0221269
Mean	0.0244619		0.0436468		0.0490059		0.0417437		0.0169975		0.000531588
SD	0.00269017		0.0398835		0.0295937		0.0546547		0.0031485		9.76546e-05
4 vs. 8	0.0387986
4 vs. 12	0.00238985											20 vs. 8	0.0218554
4 vs. 16	0.0592266											20 vs. 12	0.00149649
4 vs. 20	0.209076											20 vs. 16	0.0373125
4 vs. 0	0.130647											20 vs. 0	0.376671
Spot 63	Phosphoglycerate kinase
	4		8		12		16		20		0
	0.0615467		0.000259913		0.0533551		0.000191991		0.207034		0.00570532
	0.0232983		0.0180486		0.136631		0.00879905		0.111139		0.006298
	0.00104062		0.0045		0.0207662		0.0194034		0.0732674		0.001246
	0.0318763				0.0425301		0.0676154		0.000201142
	0.00020441				0.00948723		0.0265215		0.0520785
	0.00209271				0.0115386		0.128698		0.00814015
	0.00655521				0.110919		0.0332929		0.000853413
	0.000939539						0.0339276		0.0330468
	0.0333826						0.000766579		0.000769929
	0.00573201						0.000580423		0.00267668
	0.000800043						0.00109651		0.0503269
	0.0173401						0.0461093		0.0396678
	0.0727977						0.0553666		0.284406
	0.0274216						0.0267709		0.112784
	0.0211273						0.0676154
	0.0766588
Mean	0.0239259		0.00760284		0.0550325		0.0344504		0.0697423		0.00441644
SD	0.0258973		0.0092914		0.0501348		0.0350832		0.08507		0.00276163
4 vs. 8	0.305087
4 vs. 12	0.0604941											20 vs. 8	0.236855
4 vs. 16	0.347683											20 vs. 12	0.679749
4 vs. 20	0.0495391											20 vs. 16	0.150687
4 vs. 0	0.219893											20 vs. 0	0.21442
Spot 64	ATP synthase subunit α
	4		8		12		16		20		0
	0.0012276		0.00031586		0.068999		0.0155889		0.00625199		0.0102208
	0.00195647		0.0122447		0.144986		0.00441884		0.00593201		0.0576
	0.0019779		0.226812		0.0766746		0.00852811		0.000407841		0.03567
	0.00416597		0.0530715		0.0495567		0.0187379		0.00068203
	0.00444183		0.238137		0.0947467		0.00446011		0.00106488
	0.0205354		0.103768		0.111764		0.02055		0.00438469
	0.00658106		0.0736604		0.279795		0.00139465		0.000142534
	0.00313922		0.11443		0.191079		0.00799758		0.00454126
	0.00810955		0.0011835		0.280229		0.0247735		0.00295311
	0.00376536		0.0795348		0.0222293		0.00330782		0.00621956
	0.0117902		0.107006		0.00711539		0.000380732		0.00106929
	0.00518691		0.000272928		0.000520086		0.000558202		0.00279534
	0.00248673		0.0494527		0.0113657		0.00633487		0.00379151
	0.0294757		0.0232538		0.000267731		0.000260192		0.000239718
	0.0101281		0.0278368		0.00924554		0.000334222		0.0726254
	0.00912662				0.00162694		0.00057908		0.000894377
	0.00184988				0.0383571		0.00400752		0.00253886
	0.00242531				0.000871731		0.000370598		0.00360938
	0.000453682				0.00197704		0.00066479		0.00529952
	0.0327384				0.00128841		0.000133986		0.00591007
	0.000597363				0.00232994		0.00245735		0.000541658
	0.0145952				0.00247405		0.00555501		0.00613545
	0.000449832				0.0124393		0.000339543		0.00767606
	0.0102184				0.00024311		0.01294		0.00129592
	0.0173185				0.00110258		0.0029801		0.00401516
	0.000480908				0.0132659		0.000106405		0.00762826
	0.000321255				0.000784979		0.000100027		0.00616856
	0.0193536				0.000999175		0.000197577		0.0125148
	0.00134694				0.0271527		0.0127658		0.00176482
	0.0636342				0.00807708		0.00175113		0.00193436
	0.000786583				0.00102609		0.00157622		0.00699897
	0.0285087				0.00144153		0.000258852		0.0401117
	0.00415006				0.00324026		0.00517868		0.000217833
	0.0132274				0.00111861		0.0228311		0.0619151
	0.00138367				0.00209187		0.000415382		0.00784092
	0.00752629				0.00071002		0.0034756		0.0199702
	0.0369984				0.00367573		0.0127201		0.00356863
	0.00376398				0.0089656		0.00112225		0.0307525
	0.00914344				0.008213		0.0061798		0.00623883
	0.00143184				0.00857596		0.00581646		0.0035359
	0.020474				0.00118704		0.0102655		0.0489014
	0.00472636				0.0128631		0.0145623		0.0179981
	0.0200868				0.0206054		0.0195353		0.031355
	0.00191275				0.00542816		0.00929738		0.00785014
	0.00875864				0.0100064		0.0137914		0.00966528
	0.00280881				0.00841962		0.00813311		0.095071
	0.0370743				0.000133071		0.0320252		0.0072753
	0.0232507				0.0084557		0.0609841		0.000189082
	0.00165621				0.00375592		0.0471893		0.00607311
	0.0306622				0.00412562		0.0538508		0.00335052
	0.0186998				0.0110793		0.0365164		0.000427048
	0.000255				0.000442317		0.187966		0.000240591
	0.0364332				0.000959499		0.147038		0.0342203
	0.0034397				0.000174297		0.114832		0.000998206
	0.00936635				0.000300254		0.106747		0.0538525
	0.0268345				0.000206693		0.00157622		0.11434
	0.062171				0.000168569		0.187966		0.00393125
	0.0122298				0.00604793				0.00148577
	0.00271556				0.000179823				0.119607
					0.000315867
					0.000398283
					0.000357075
					0.000359008
					0.000143468
					0.000235441
					0.00391161
					0.000318933
					0.00083064
					0.00119134
					0.000335259
					0.00157304
					0.00475383
					0.000573436
					0.000433361
					0.000235295
					0.00389364
					0.000345309
					0.000220155
					0.000289673
					0.00132808
					0.000370993
					0.00149353
					0.00747273
					0.00114326
					0.000255872
					0.000792333
					0.00340901
					0.000457439
					0.0121956
					0.0043573
					0.00459542
					0.00347801
					0.00274589
					0.00157126
					0.00274443
					0.0029713
					0.0222676
					0.00976904
					0.0164427
					0.00801072
					0.0115745
					0.0177548
Mean	0.0122094		0.0740653		0.017187		0.0223583		0.0155765		0.0344969
SD	0.0143846		0.007543		0.047221		0.0430269		0.002723		0.0237114
4 vs. 8	7.3863e-08
4 vs. 12	0.431934											20 vs. 8	5.71797e-06
4 vs. 16	0.0889718											20 vs. 12	0.810844
4 vs. 20	0.402836											20 vs. 16	0.310864
4 vs. 0	0.0134804											20 vs. 0	0.243259
Spot 68	Arginine kinase
	4		8		12		16		20		0
	0.0752411		0.0717756		0.2002		0.0574089		0.00362883		0.000552941
	0.017813		0.052364		0.0480959		0.234494		0.00219164		0.00034
	0.000541738		0.0921867		0.000621634		0.108786		0.00207177		0.00046
	0.0467782				0.000740667		0.0170037		0.00352639
	0.0329147				0.0811692		0.112526		0.000419919
	0.0023255				0.053199		0.0150057		0.000489915
	0.124184				0.0982181				0.0556897
	0.0939469				0.0340369				0.0567228
	0.266346				0.224964				0.0926543
	0.0847627				0.0384699				0.0735514
	0.120104				0.0674759				0.275575
	0.416459								0.0439866
									0.0307129
									0.275575
									0.0350235
									0.0286724
Mean	0.106785		0.0721088		0.0770174		0.0908707		0.0612808		0.00045098
SD	0.121601		0.0199134		0.0734924		0.0821573		0.0883453		0.000106757
4 vs. 8	0.639835
4 vs. 12	0.490348											20 vs. 8	0.838706
4 vs. 16	0.777591											20 vs. 12	0.631423
4 vs. 20	0.261104											20 vs. 16	0.484817
4 vs. 0	0.164627											20 vs. 0	0.260075
Spot 69	Fructose bisphosphate aldolase
	4		8		12		16		20		0
	0.0164122		0.0633972		0.161745		0.000594536		0.00481302		0.0774431
	0.00536304		0.00500351		0.252631		0.00552789		0.0257522		0.0654
	0.0176706		0.0665951		0.38652		0.000180637		0.0123132		0.0341
	0.024856		0.0869728		0.0388258		0.000324027		0.0018377
	0.187825		0.00233424		0.000742632		0.00593064		0.00186839
	0.00947002		0.0639804		0.0877758		0.000130654		0.000324678
	0.013514		0.0585849		0.00323577		0.000162379		0.00357272
	0.00065877		0.0776314		0.00015847		0.000298051		0.00189023
	0.00170569				0.0588691		0.00237309		0.00830782
	0.000601162				0.0406658		0.00117676		0.00727033
	0.0653214						0.000218211		0.0324216
	0.00115243						0.00160791		0.000210187
	0.0616911						0.000378498		0.0374241
	0.0025688						0.000104109		0.00103497
	0.000257153						0.000721149		0.0015911
	0.000106724						0.0643537		0.0516572
	0.016937						0.001564		0.000962575
	0.0120586						0.0731695		0.000367558
	0.000123219						0.0693316		0.0183783
	0.0055653						0.00285513		0.000378492
	0.000634779						0.0932231		0.0826249
	0.0139504								0.0269858
	0.00039358								0.000418102
	0.00485994								0.000649466
	0.00374513								0.104876
	0.0609224								0.0267602
	0.0139047								0.0408418
	0.00236904								0.139971
	0.00548806								0.00165212
	0.0256651								0.000499445
	0.187883								0.00128175
	0.0521126								0.00031057
	0.107298								0.000293087
	0.0779621								0.000384558
	0.0217412								0.0025261
	0.000428424								0.00251248
	0.000630152								0.000277848
	0.0221712								0.00230487
	0.0136569								0.00496043
	5.02862e-05								0.0408418
	0.00125661								0.0129617
	0.000358604								0.139972
	0.0588858								0.0243478
	0.000361873								0.139971
	0.000222392								0.0826249
	0.00237411								0.104876
	0.0224766								0.00115616
	0.0719087
	0.147984
	0.0025451
	0.113019
Mean	0.0290415		0.0530624		0.103117		0.0154393		0.0255161		0.058981
SD	0.00464183		0.0317944		0.0012797		0.0300616		0.004061		0.0223732
4 vs. 8	0.164714
4 vs. 12	0.00186784											20 vs. 8	0.0743045
4 vs. 16	0.220047											20 vs. 12	0.000937563
4 vs. 20	0.691009											20 vs. 16	0.312582
4 vs. 0	0.275502											20 vs. 0	0.166658
Spot 71	Arginine kinase
	4		8		12		16		20		0
	0.235793				0.117875		0.0470922		0.00597443		9.44693e-05
	0.0752411				0.158555		0.0394545		0.068794		0.000222197
	0.132812				0.136524		0.0346		0.0609258		0.000250359
	0.0749971								0.00659464		0.000585156
									0.0065881		0.000222489
									0.00285215		0.000450116
									0.0250495		8.67806e-05
									0.0777263
									0.106691
									0.144001
									0.00438076
									0.0775249
Mean	0.129711				0.137651		0.0403822		0.0489252		0.000273081
SD	0.0757707				0.0203634		0.00629756		0.0473561		0.000183033
4 vs. 8	Nil
4 vs. 12	0.86942											20 vs. 8	Nil
4 vs. 16	0.103489											20 vs. 12	0.00838721
4 vs. 20	0.0227636											20 vs. 16	0.766437
4 vs. 0	0.00108812											20 vs. 0	0.0156431
Spot 72	Glyceraldehyde-3-phosphate dehydrogenase
	4		8		12		16		20		0
	0.0103485		0.0049738		0.1414		0.112118		0.00597443		0.000242627
	0.000190322		0.0237192		0.157286		0.0637995		0.068794		0.0023
	0.000238131		0.060546		0.026675		0.124468		0.0609258		0.00073
	0.0025451		0.0371208		0.11758		0.042259		0.00659464
	0.128182		0.0733814		0.02445		0.0346706		0.0065881
	0.113019				0.0426582		0.0526404		0.00285215
	0.0367906				0.0257909		0.0302432		0.0250495
	0.0576492				0.0333909		0.0544938		0.0777263
	0.0582079				0.0227585		0.0504172		0.106691
	0.0595985								0.144001
	0.107298								0.00438076
	0.0703466								0.0775249
Mean	0.0537012		0.0399482		0.0657766		0.06279		0.0489252		0.00109088
SD	0.0455177		0.0275528		0.0559531		0.0332319		0.0473561		0.00107511
4 vs. 8	0.542856
4 vs. 12	0.59158											20 vs. 8	0.700271
4 vs. 16	0.619224											20 vs. 12	0.464155
4 vs. 20	0.803475											20 vs. 16	0.463168
4 vs. 0	0.0735358											20 vs. 0	0.112709
Spot 74	Glyceraldehyde-3-phosphate dehydrogenase
	4		8		12		16		20		0
	0.0873016		9.06433e-05		0.246378		0.0220419		0.000367831		0.000755416
	0.000154465		0.00429508		0.266216		0.00258911		0.000887857		0.0130787
	0.0421992		0.00471394		0.00186934		0.00390476		0.000418702		0.000626144
	0.000572187		0.00110349		0.00819249		0.000171956		0.0132309		0.00934725
	0.00266885		0.000145701		0.00759903		0.000375592		0.0361264		9.43852e-05
	0.0144343		0.000135807		0.000161218		0.000455831		0.000579599		0.00417577
	0.0115493		0.00186679		0.000701341		0.16396		0.00128251		0.000362625
	0.0028028		0.0482617		0.000363036				0.000888693		0.00011068
	0.0276688		0.00145055		0.000756389				0.00088061		0.00136932
	0.00210688		0.0162118		0.00157509				0.000429399		0.00416485
	0.0103602		0.000581306		0.000120144				0.000996538		0.000270789
	0.0089574		0.000320242		0.00129022				0.0131393		0.000259382
	0.000597669		0.000363623		0.00102205				0.000444273		0.00024994
	0.00955401		0.000166328		0.000202692				0.00091352		0.00293333
	0.0209348		0.0282883		0.0118554				0.02313		0.00331967
	0.00102863		0.0017143		0.00726833				0.00179731		0.0037206
	0.00032429		0.00029896		0.0168442				0.0011629
	0.00755618		0.00115167		0.00104581				0.0175793
	0.00482171		0.00389959						0.0216496
	0.0115834		0.000272849						0.0217959
	0.0117092		0.000388133						0.000416432
	0.00304746		0.00450914						0.0375586
	0.0162731		0.000351577						0.0400195
	0.000284516		0.000572648						0.0516453
	0.000622522		0.0409502						0.0071552
	0.000247393		0.0010663						0.0154982
	0.000177685		0.00390603						0.0224903
	0.0146017		0.000123237						0.012685
	0.00102315		0.0066186						0.0478484
	0.00481332		0.0144144						0.000497234
	0.000322838		0.00982473						0.0634356
	0.000119728		0.0460421
	0.011269		0.000205586
	0.0182733		0.115599
	0.000465322		0.0774641
	0.000552114
	0.000163069
	0.000432997
	0.00297346
	0.000302017
	0.00865071
	0.000164138
	0.00247323
	0.00201332
	0.0177442
	0.0178215
Mean	0.00877647		0.0124962		0.0318589		0.0276427		0.0147404		0.00280243
SD	0.0147247		0.0251704		0.0818594		0.0606111		0.0179517		0.00368971
4 vs. 8	0.407247
4 vs. 12	0.0677829											20 vs. 8	0.681687
4 vs. 16	0.0683233											20 vs. 12	0.265648
4 vs. 20	0.11497											20 vs. 16	0.305794
4 vs. 0	0.115411											20 vs. 0	0.0119971
Spot 75	Glyceraldehyde-3-phosphate dehydrogenase 1
	4		8		12		16		20		0
	0.000723618		0.115766		0.176185		0.138367		0.0025094		0.0131823
	0.000879965		0.0017551		0.000392371		0.0318916		0.000874072		0.00079532
	0.000634253		0.00216145		0.000311699		0.00267547		0.000868097		0.00409885
	0.169712		0.0858421		0.0048933		0.0550501		0.000874999		0.0125257
	0.000588852		0.00177798		0.000259361		0.101757		0.0408878		0.00716928
	0.00933649		0.00149099		0.000739993		0.000455477		0.000481741
	0.000125185		0.00314905		0.000220525		0.00887756		0.00667411
	0.0014087		0.0217324		0.000203856		0.0117336		0.00206476
	0.0327067		0.0125534		0.00135508		0.000582128		0.000317922
	0.0505477		0.0555849		0.00351751		0.00457156		0.0124758
	0.00023427		0.0921688		0.00551402		0.00153329		0.00666601
	5.3194e-05		0.0636975		0.00612188		0.000190986		0.0138195
	0.0229978				0.0015599		0.000265798		0.0246635
	0.000185682				0.00659383		0.000404766		0.00565991
	0.00110704				0.000668493		0.000219365		0.00116439
	0.0195364				0.000250399		0.000532504		0.00981035
	0.0199738				0.00046428		0.000390566		0.0260656
	0.00472711				0.000169845		0.000343048		0.0261305
	0.0103589				7.90581e-05		0.000715426		0.00428871
	0.0154711				0.000703716		0.0601676		0.0169985
	0.0625441				0.00142863		0.0783943		0.00279946
					0.000119938		0.0693149		0.0316365
					0.00333018		0.000972972		0.00379853
					0.000223949		0.0331198		0.171272
					0.00628012		0.000132645		0.000694748
					0.0155981		0.00556331		0.00156956
					0.00879102		0.000104109		0.0227698
					0.0116198		0.0643537		0.0179252
					0.0183498				0.00779258
					0.00944338				0.00379853
					0.00260277				0.00142599
					0.00271169				0.00844745
					0.0120147
Mean	0.0201835		0.03814		0.00917328		0.0240243		0.0149133		0.00755429
SD	0.0384415		0.0422222		0.0303681		0.037256		0.0304586		0.00534232
4 vs. 8	0.222098
4 vs. 12	0.247216											20 vs. 8	0.0495845
4 vs. 16	0.72618											20 vs. 12	0.449651
4 vs. 20	0.581343											20 vs. 16	0.301797
4 vs. 0	0.477372											20 vs. 0	0.597541
Spot 78	Voltage-dependent anion-selective channel (Porin)
	4		8		12		16		20		0
	0.000839612		0.184393		0.14756		0.000363591		0.0492657		0.0424358
	0.000335445		0.22624		0.306281		0.00366664		0.173129		0.0379
	0.00635954		0.291148		0.0072518		0.024449		0.188244		0.02731
	0.0473005		0.163163		0.000241435		0.000319884		0.391249
	0.0310192				0.213031		0.000169793		0.0654497
	0.224404				0.00513268		0.00126708		0.0448848
	0.221439				0.000583763		0.316947		0.189802
	0.0862323				0.106532		0.126375		0.00022093
	0.227122				0.0567373		0.153606		0.0610651
	0.248195				0.177368		0.135022		0.0958485
					0.000624567		0.0228158		0.189802
					0.250445		0.000234868
					0.121811		0.00338043
					0.0147891		0.00651456
							0.00973604
							0.261135
							0.240445
							0.316947
							0.126375
Mean	0.109325		0.216236		0.100599		0.0920931		0.131724		0.0358819
SD	0.10736		0.0563992		0.104943		0.115668		0.110143		0.00776221
4 vs. 8	0.0875662
4 vs. 12	0.844146											20 vs. 8	0.172765
4 vs. 16	1.39855											20 vs. 12	0.478552
4 vs. 20	0.642978											20 vs. 16	0.365543
4 vs. 0	0.275242											20 vs. 0	0.169231
Spot 79	Alcohol dehydrogenase
	4		8		12		16		20		0
	0.00236154		0.00254029		0.266765		0.00381248		0.178759		0.0463031
	0.0209375		0.000547875		0.256503		0.0186166		0.00360604		0.0480004
	0.121054		0.000788655		0.204241		0.000348745		0.000276441		0.05319
	0.000288432		0.00098196		0.284897		0.0023986		0.0346283
	0.000490606		0.00089814		0.35588		0.00055481		0.0223218
	0.000201087		0.00289113		0.0513554		0.000300751		0.225992
	0.00212702		0.0111787		0.00355961		0.00656403		0.000950135
	0.000536855		0.000374566		0.00899008		0.00210215		0.0114214
	0.0246294		0.000894336		0.00395138		0.000825139		0.000590312
	0.000274022		0.0656175		0.00663974		0.0145289		0.010635
	0.000460445		0.000471032		0.0013849		0.000275161		0.00187343
	0.0020201		0.085125		0.00579959		0.000122409		0.00127069
	0.000560303		0.000388163		0.00154598		0.0068647		0.000124045
	0.00129587		0.00346849		0.00788692		0.0151521		0.000792325
	0.00513527		0.00121041		0.00381298		0.000508239		0.000672966
	0.00127944		0.0789791		0.0245526		0.000247376		0.0829796
	0.13834				0.0013102		0.000238826		0.000418284
	0.000193882				0.0017558		0.000287489		0.00013111
	0.00220357				0.0125387		0.09803		0.000314548
	0.00375736				0.00901832		0.0118196		0.165561
	0.00222278				0.00527278		0.000260477		0.216255
	0.000347754				0.00766319		0.0499476		0.028039
	0.0678682				0.00106481		0.0316899		0.0302533
	0.296763				0.00983197		0.00784909		0.129777
	0.00025817				0.00126549		0.0008384		0.000137365
	0.00120023				0.00188653		0.000337187		0.0485151
	0.0137098				0.00456489		0.265207		0.0017045
	0.00810658				0.000808728		0.00518546		0.00064925
	0.00240225				0.000959754		0.00919518		0.0298936
	0.000752879				0.000779957		0.287258		0.00290789
	0.00872739				0.0742294		0.000560761		0.00197355
	0.000701764				0.000950602		0.0193876		0.00508446
	0.0152257				0.000704725		0.00398639		0.0011871
	0.0624053				0.00117149		0.0448216		0.00170245
	0.00242461				0.00190981		0.140882		0.258306
	0.0196787				0.00864089		0.171338		0.00532732
	0.000466937				0.0063803		0.172659		0.000314548
	0.000769273				0.00472267				0.165561
	0.153265				0.00162976				0.000657093
	0.0896406				0.000641615				0.00293969
	0.000823135				0.00218342				0.0081063
	0.00246623				0.00352982				0.216255
	0.0353994				0.0140239				0.00500289
	0.0091194				0.106026				0.00579815
	0.0557706				0.104033				0.0122503
	0.0183416				0.0187921				0.000183879
	0.0630318				0.0336487				0.028039
	0.0593447				0.00635696				0.0302533
	0.0103816				0.0186625				0.00239535
	0.0271067				0.002455				0.00946849
	0.000446916				0.00859113				0.0146443
	0.000297994				0.010884				0.178759
	0.051031				0.000411033				0.000526492
	0.000272835				0.000706178				0.00360604
	0.00941777				0.000100856				0.000276441
	0.147063				0.0009904				0.225992
	0.0794641				0.00175741				0.010635
	0.0169715				0.00279097
	0.031334				0.00654508
	0.0443482				0.0497228
	0.00626384				0.377704
	0.0278446				0.104327
	0.0220792
	0.0212567
	0.0361084
	0.0149761
	0.00752851
	0.0085542
	0.000236991
	9.09398e-05
	0.000192219
	0.00538207
	0.0013841
	0.000657606
	0.0192584
	0.0138093
	0.00751559
	0.227423
	0.0920762
	0.0115938
	0.105447
Mean	0.0292246		0.0160222		0.0406727		0.0377028		0.0425736		0.0491645
SD	0.0521173		0.0303749		0.0881474		0.0737864		0.0781043		0.00358799
4 vs. 8	0.330383
4 vs. 12	0.33424												0.169611
4 vs. 16	0.475545												0.899576
4 vs. 20	0.217513												0.75665
4 vs. 0	0.511883												0.879749
Spot 83	Triosephosphate isomerase
	4		8		12		16		20		0
	0.00012505		0.000803138		0.14853		0.00832032		0.0707031		0.0216053
	0.000427503		0.0428604		0.0350533		0.101187		0.139752		0.01593
	0.00165422		0.124811		0.0344984		0.20143		0.128667		0.041854
	0.145764		0.00022935		0.218033		0.0871393		0.105467
	0.0181836		0.00621208		0.168976		0.124473		0.162461
	0.149962		0.151903		0.0203818		0.0330826		0.129556
	0.155399						0.275079		0.13387
	0.106354
Mean	0.0722337		0.0544698		0.104245		0.118673		0.124354		0.0264631
SD	0.0734728		0.0674193		0.084598		0.093228		0.0290419		0.0136276
4 vs. 8	0.65152
4 vs. 12	0.46365											20 vs. 8	0.029548
4 vs. 16	0.30029											20 vs. 12	0.565083
4 vs. 20	0.102938											20 vs. 16	0.880232
4 vs. 0	0.326226											20 vs. 0	0.000613084
Spot 85	Capon-like protein
	4		8		12		16		20		0
	0.0823497						0.165307		0.128541
	0.0591791						0.0555278		0.0893573
	0.0476						0.106566		0.0893573
									0.128541
Mean	0.0630429						0.109134		0.108949
SD	0.0176941						0.0549346		0.0226227
4 vs. 16	0.238789
4 vs. 20	0.034155											20 vs. 16	0.995288
Spot 86	Superoxide dismutase [Cu-Zn]
	4		8		12		16		20		0
	0.168745						0.182263		0.201865
	0.129751						0.106566		0.171996
	0.11287						0.12754		0.171996
									0.201865
Mean	0.137122						0.13879		0.18693
SD	0.0286575						0.0390823		0.0172449
4 vs. 16	0.955332
4 vs. 20	0.0339297											20 vs. 16	0.0748946
Spot 87	Protein stand still
	4		8		12		16		20		0
	0.326643								0.034378
	0.265471								0.0027643
	0.12578								0.269933
									0.00127064
									0.325055
									0.325055
									0.269933
Mean	0.239298								0.175484
SD	0.102958								0.154206
4 vs. 20	0.536295
Spot 90	ATP synthase subunit β
	4		8		12		16		20		0
	0.000106384						0.00113227		0.000608275
	0.000529616						0.00107816		0.00177686
	0.0320018						0.00484432		0.000195947
	0.279881						0.000445847		0.000352829
	0.0618867						0.000169467		0.00611457
	0.354143						0.0081537		0.000222337
							0.00103451		0.0016528
							0.000422733		0.000302667
							0.00036028		0.000357206
							0.000280868		0.000918333
							0.00260885		0.00376935
							0.00010086		0.00279597
							0.000179135		0.000306607
							0.000311556		0.0431703
							0.000966211		0.000422916
							0.0113552		0.000856838
							0.00023054		0.00195895
							0.0236969		0.000809744
							0.0449366		0.0234722
									0.0398168
									0.00137632
									0.0273073
									0.000130381
									0.000327051
									0.000569758
									0.000233831
									0.000171122
									0.0339884
									0.000876957
									0.000597328
									0.000210844
									0.000813929
									0.00137632
									0.182459
									0.00331157
									0.0561595
									0.000195947
Mean	0.121425						0.00538463		0.0118915
SD	0.0015501						0.0011207		0.032147
4 vs. 16	0.00247812
4 vs. 20	0.00024514											20 vs. 16	0.397532
Spot 94	Myosin light chain alkali
	4		8		12		16		20		0
	0.0454824		0.0724255		0.024287		0.00300423		0.000179656
	0.00566946		0.00531139		0.0585941		0.00153727		0.000213855
	0.0858199		0.000143943		0.0140006		0.000122653		0.0029684
	0.00552273		0.0535533		0.0431046		0.00120291		0.178017
	0.202442		0.000795555		0.0305792		8.45713e-05		0.00303665
	0.000246778		0.00165493				0.000117717		0.00196801
	0.241771		0.000167089				0.000133356		0.000319249
	0.155937						0.0884472		0.000255318
	0.00510804						0.207572		0.000856965
	0.000149916						0.00176235		0.00514427
	0.111214						0.000429659		0.112109
	0.0679804						0.000220465		3.47979e-05
	0.206955						0.0063944		0.000142534
							0.0166381		5.13253e-05
							0.0218572		0.0258931
							0.0163958		0.158415
							0.183922		3.29772e-05
									0.000314595
									0.158415
									0.00579994
									0.0986594
									0.000247957
									0.000165236
									0.00446278
									0.00276057
									0.00113837
									0.178512
									0.000233306
									0.000834356
									0.0450954
									0.00153566
									0.0113235
									9.83587e-05
									0.103437
									0.00074675
									0.000858344
									0.000201522
									0.0438007
									0.178017
									0.000856965
									0.112109
									0.000618717
									0.103858
Mean	0.0872537		0.0191502		0.0341131		0.0323436		0.0359009
SD	0.0885642		0.0304902		0.0172751		0.0652078		0.060008
4 vs. 8	0.0666835
4 vs. 12	0.283705											20 vs. 8	0.475603
4 vs. 16	0.117459											20 vs. 12	0.947879
4 vs. 20	0.0195352											20 vs. 16	0.840671
Spot 96	Calcium-transporting ATPase
	4		8		12		16		20		0
	0.241406		0.00924694		0.23644		0.104693		0.16821		0.130463
	0.055631		0.000232854		0.00400164		0.0267464		0.00274266		0.1145
	0.246804		0.264083		0.19957		0.0750532		0.0119351		0.21347
			0.202729		0.000356619				0.0124712
					0.128863				0.237014
					0.0378419
					0.00180707
Mean	0.18128		0.119073		0.0869829		0.0688309		0.0864746		0.152811
SD	0.108849		0.134426		0.100687		0.0393441		0.108842		0.0531351
4 vs. 8	0.542884
4 vs. 12	0.220364											20 vs. 8	0.698717
4 vs. 16	0.167705											20 vs. 12	0.993506
4 vs. 20	0.278012											20 vs. 16	0.801063
4 vs. 0	0.704778											20 vs. 0	0.371271
Spot 97	ATP synthase D chain
	4		8		12		16		20		0
	0.107473		0.051859		0.0404196		0.0489558		0.134395		0.0167109
	0.0745834		0.000185868		0.11734		0.000547901		0.105175		0.02346
	0.0661797		0.0704345		0.0269937		0.0490607		0.0207667		0.01523
	0.0727275				0.0521626				0.0107003
					0.000356619
					0.128863
					0.0378419
					0.00180707
Mean	0.0802409		0.0408265		0.0507231		0.0328548		0.0677592		0.018467
SD	0.0185091		0.0364006		0.0482708		0.0279786		0.0613848		0.00438703
4 vs. 8	0.11545
4 vs. 12	0.27392											20 vs. 8	0.608077
4 vs. 16	0.0415645											20 vs. 12	0.608077
4 vs. 20	0.710458											20 vs. 16	0.408993
4 vs. 0	0.00263291											20 vs. 0	0.233413
Spot 98	Tyrosine kinase 2
	4		8		12		16		20		0
	0.0472981		0.150841		0.0358928		0.0567605		0.0209753		0.00349832
	0.0209038		0.044669		0.0134494		0.0599095		0.0319244		0.002612
	0.0336425		0.00102003		0.0318602		0.0482285		0.0371153		0.0027123
	0.013295		0.0025127		0.0206753		0.0584418		0.0134072
			0.0344024		0.0151515				0.0787635
			0.0393295						0.0835904
									0.0303089
									0.00304599
									0.000144168
Mean	0.0287849		0.0454624		0.0234058		0.0558351		0.0332528		0.00294087
SD	0.0149263		0.0549273		0.0100265		0.00523171		0.029966		0.000485361
4 vs. 8	0.576446											20 vs. 8	0.585179
4 vs. 12	0.5374											20 vs. 12	0.495975
4 vs. 16	0.0141354											20 vs. 16	0.171665
4 vs. 20	0.785954											20 vs. 0	0.120673
4 vs. 0	0.0327985
Spot 99	Furin-like protease
	4		8		12		16		20		0
	0.0352087		0.0550826		0.0391327		0.0502332		0.0273386		0.0299661
	0.0336425		0.0386471		0.0579068		0.056998		0.0330091		0.01462
	0.013295		0.0284411		0.0431053		0.0432		0.0330091		0.02415
									0.0273386
Mean	0.0273821		0.0407236		0.0467149		0.0501437		0.0301739		0.022912
SD	0.0122249		0.0134416		0.00989388		0.00689944		0.00327386		0.00774759
4 vs. 8	0.272349
4 vs. 12	0.1003											20 vs. 8	0.180198
4 vs. 16	0.0483899											20 vs. 12	0.0237909
4 vs. 20	0.672073											20 vs. 16	0.0035233
4 vs. 0	0.621043											20 vs. 0	0.145444
Spot 100	Thioredoxin peroxidase
	4		8		12		16		20		0
	0.106823		0.200373		0.0755476		0.0455246		0.127365		0.00380408
	0.0968014		0.202436		0.0436356		0.0250196		0.128579		0.00117817
	0.08432		0.000731724		0.168799		0.03461		0.128579		0.0018974
			0.000318871		0.136942				0.127365		0.00120457
			0.000526991								0.00413859
			0.139462
Mean	0.0959815		0.0906414		0.106231		0.0350514		0.127972		0.00244456
SD	0.0112739		0.101277		0.0569139		0.0102596		0.000700903		0.00142817
4 vs. 8	0.932332
4 vs. 12	0.775888											20 vs. 8	0.490686
4 vs. 16	0.00228451											20 vs. 12	0.473865
4 vs. 20	0.00205541											20 vs. 16	8.085e-06
4 vs. 0	1.22616e-06											20 vs. 0	1.00398e-07
Spot 102	Actin-57B
	4		8		12		16		20		0
	0.0803962				0.0280028		0.122294		0.0629922		0.0025828
	0.0508223				0.0357883		0.180727		0.0735926		0.0015324
	0.0716084				0.000118234		0.00132301		0.0456532		0.000445896
	0.0865029				0.0265092		0.0723206		0.0626873		0.000872575
					0.016656		0.149777		0.0656645		0.000271291
					0.0492271		0.115579		0.000127641		0.000157016
					0.0288844		0.00825874				0.000849805
					0.000155982		0.0450992
					5.29547e-05		0.122294
					0.0552951		0.180727
Mean	0.0723325				0.024069		0.09984		0.0517862		0.000958826
SD	0.0155888				0.0199086		0.065559		0.0269026		0.000852868
4 vs. 8
4 vs. 12	0.00101107											20 vs. 8
4 vs. 16	0.432972											20 vs. 12	0.0327463
4 vs. 20	0.209293											20 vs. 16	0.112597
4 vs. 0	5.02629e-07											20 vs. 0	0.000381597
Spot 104	Actin-88F
	4		8		12		16		20		0
	0.103101		0.116762		0.277056		0.000337025		0.339911		0.0208585
	0.124641		0.143576		0.000298123		0.000105247		0.303882		0.0856261
	0.114794		0.1237		0.154592		0.000848167		0.000376334		0.035183
					0.154045		0.000748733		0.00130294
							0.000858282		0.00115802
							0.000785776		0.303882
							0.00157409		0.339911
							0.00190624
							0.0186849
							0.00114378
							0.123585
							0.000529315
							0.00315189
							0.000537798
							0.1676
							0.000418525
							0.00276102
							0.000475881
							0.0275482
							0.191797
							0.00110519
							0.000858282
							0.000785776
							0.00190624
							0.0186849
Mean	0.114179		0.128013		0.146498		0.0227495		0.184346		0.0472225
SD	0.0107832		0.0139175		0.113346		0.0053503		0.172185		0.0340209
4 vs. 8	0.245155
4 vs. 12	0.651145
4 vs. 16	0.00738416											20 vs. 8	0.599391
4 vs. 20	0.514824											20 vs. 12	0.706035
4 vs. 0	0.0313904											20 vs. 16	0.000325806
												20 vs. 0	0.222081
Spot 105	ATP synthase subunit β
	4		8		12		16		20		0
	0.0762885		0.000630619		0.0412591		6.72872e-05		0.0687134		0.00347167
	0.00257648		6.37441e-05		0.0408313		0.058275		0.000928867		0.00047151
	0.0506695		0.0013011		0.0112285		0.0518562		0.0544765		0.00087972
	0.124641		0.0996862		0.000155795		0.0422311		0.000376784		0.000586411
			0.0155853		0.0324201		0.0155521		0.000248514		0.000303043
			0.00261254		0.154045		0.058275		0.000133436		0.000255245
			0.0698563				0.0518562		0.0561386		0.00926137
			0.000588705						0.00635499		0.000231182
			0.0403921								0.00179169
											0.000428181
Mean	0.0635439		0.0256352		0.0466566		0.0397304		0.0234214		0.001768
SD	0.0509184		0.0367193		0.0551643		0.0228979		0.0304578		0.00281881
4 vs. 8	0.152889
4 vs. 12	0.638653											20 vs. 8	0.895005
4 vs. 16	0.303815											20 vs. 12	0.331732
4 vs. 20	0.113518											20 vs. 16	0.268002
4 vs. 0	0.00151853											20 vs. 0	0.0386043
Spot 106	Actin-5C
	4		8		12		16		20		0
	0.0424627		0.000564171		0.0262845		5.46544e-05		0.00175263		0.00207756
	0.048664		0.000336749		0.135167		0.00226356		0.0834298		0.00214153
	0.0125376		0.159927		0.0299994		0.0741564		0.077842		0.0187325
	0.000238074		0.0545125		0.0655688		0.00518963		0.086952		0.00248673
	0.0114969		0.000903309		0.0332688		0.000418591		0.000786075
			0.00022155		0.00569625		0.00205966		0.000310633
			0.00520552		0.0121364		0.00115044		0.0260602
			0.00849531				0.0563664		0.00521378
			0.000263934				0.0652446		0.00584592
			0.001097				0.0129776
			0.0133815				0.0741564
			0.000596236
			0.000197495
			0.000673644
Mean	0.0230799		0.0175983		0.0440173		0.0267307		0.0320214		0.00635958
SD	0.0211973		0.043407		0.0445049		0.032831		0.0388852		0.00825057
4 vs. 8	0.79227
4 vs. 12	0.35648											20 vs. 8	0.427735
4 vs. 16	0.824586											20 vs. 12	0.574322
4 vs. 20	0.646											20 vs. 16	0.745064
4 vs. 0	0.183967											20 vs. 0	0.227891
Spot 111	Protein l(2)37Cc
	4		8		12		16		20		0
	0.127048		0.00152912		0.0349669		0.25139		0.000135941		0.000626351
	0.12128		0.0451266		0.0537047		0.150298		0.000207244		0.000266737
	0.0572003		0.000470353		0.0663214		0.000395336		0.0562085		0.000514128
	0.102338		0.0372086		0.0946044		0.00162444		0.0132055		0.00330261
	0.00106783		9.27684e-05		0.0371914		0.0598224		0.000183997		0.00171122
	0.0780996		0.0053481		0.0869278		0.000176596		0.0705918		0.0082183
	0.0832684		0.0138294		0.030058		0.0148853		4.90368e-05		0.00515388
	0.0600825		0.000806013				0.000241473		0.0312165		0.0310657
	7.52095e-05		0.0797016				0.0346617		0.000190771		0.00370898
	0.0431211		0.000132978				0.25139		0.00413746		0.00135708
									0.0717635		0.00561453
									0.000400737
									0.0144196
									0.099661
									0.1012
									0.0659338
									0.0144196
									0.000517692
									0.099661
									0.1012
									0.0659338
									0.0024067
									0.0562085
									0.0705918
									0.0312165
									0.0717635
Mean	0.0673581		0.0184246		0.0576821		0.0764885		0.0401317		0.0055945
SD	0.0443816		0.002708		0.0258456		0.103001		0.0381132		0.00881239
4 vs. 8	0.00809308
4 vs. 12	0.613512											20 vs. 8	0.109817
4 vs. 16	0.799762											20 vs. 12	0.261874
4 vs. 20	0.0752294											20 vs. 16	0.125839
4 vs. 0	0.000229249											20 vs. 0	0.00787486
Spot 114	Myosin regulatory light chain-2
	4		8		12		16		20		0
	0.00692054		0.00171747		0.203938		0.00172706		0.000648848		0.0383446
	0.00525065		0.00301324		0.374717		0.00110536		0.00484791		0.00392193
	0.0651615		0.000179371		0.000344801		0.000671065		0.0192802		0.00351733
	0.00526132		0.00176961		0.000506109		0.000707624		0.0363041		0.00432723
	0.0814989		0.000290037		0.000772242		0.000261107		0.0226238		0.00626391
	0.0205741		0.020431		0.000879174		0.000200135		0.000210254		0.00368742
			0.00237682		0.000798792		0.000968525		0.00577025		0.00115047
			0.000225689		0.00107877		0.000490021		0.00034218		0.00430955
			0.000227237		0.00130234		0.0140328		0.0120387		0.0035195
			0.124389		0.00148898		0.000288748		0.00923648		0.000456759
			0.000924853		0.00271421		0.0758609		0.0042906		0.000334714
			0.000994136		0.00147584		0.000454458		0.0158124		0.00336058
			0.00081592		0.00464482		0.00267341		0.0947635		0.00263306
			0.0262756		0.00535485		0.0309568				0.000761099
			0.112699		0.000472871		0.00121556				0.00128263
			0.00157595		0.00448742		0.00015586				0.00309028
			0.000239756		0.000225719		0.119347				0.00284189
			0.000743448		0.000269882		0.00279066				0.0458484
			0.00120887		0.0015478		0.0027876				0.00768262
			0.00162229		0.00272446		0.000565558				0.00146249
			0.000722414		0.0187437		0.0113047				0.000573164
			0.00176107		0.00413359		0.210226				0.0125427
			0.00173236		0.000506071						0.000633791
			0.000873234		0.00175464						0.00094703
			0.000482852		0.0020571						0.00184388
			0.00337258		0.00817825						0.00149955
			0.00202961								0.0192678
			0.000946181								0.00123783
			0.000721608								0.00146404
			0.000854052								0.000376036
			0.000435203								0.000855192
			0.00490484								0.0012901
			0.00283294								0.00803487
			0.00416914								0.000831168
			0.00040671								0.00445115
			0.00026642								0.00143697
			0.00130771								0.000675991
			0.00143949								0.0370493
			0.0059965								0.00171594
			0.00224467								0.00778635
			0.00138667								0.0284493
			0.00175159								0.00447743
			0.0018581								0.00138474
			0.00997628								0.0445936
			0.00196722								0.0102781
			0.000366008								0.000213764
			0.0042716
Mean	0.0307778		0.00767652		0.0248122		0.0217632		0.0173976		0.00723274
SD	0.00338552		0.024134		0.0816179		0.0512175		0.0254999		0.00110774
4 vs. 8	0.039773
4 vs. 12	0.880709											20 vs. 8	0.209094
4 vs. 16	0.689015											20 vs. 12	0.75228
4 vs. 20	0.350104											20 vs. 16	0.839577
4 vs. 0	0.00103629											20 vs. 0	0.0448812
Spot 115	Actin-5C
	4		8		12		16		20		0
	0.103455		0.0263392		0.0477399		0.00113324		0.000308823		0.00462389
	0.00243014		0.000489326		0.199728		0.00115219		0.000792508		0.00667015
	0.0654855		0.000423902		0.0470327		0.000564274		0.00306622		0.00178371
	0.000436014		0.0116454		0.0071107		0.000218902		0.00197259		0.000800961
	0.000835493		0.0213156		0.000430206		0.00453024		0.00484254		0.00408904
	0.000299833		0.000331449		0.01687		0.000394708		0.000551827		0.0041619
	0.0370088		0.000931757		0.00666345		0.000162399		0.00080624		0.0027505
	0.00467611		0.000428704		0.0164185		0.000261797		0.00991345		0.00126988
	0.006078		0.00512845		0.000217218		0.000109187		0.000394783		0.000541035
			0.00224556		0.000173877		0.000641415		0.000730776		0.00124175
			0.00135246		0.0194316		0.000165953		0.00135162		0.00513672
			0.000976132		0.00165539		0.00465324		0.000641148		0.00260903
			0.000202229		0.000449193		0.00118617		0.000370826		0.0129352
			0.00579914		0.0112237		0.00122057		0.000537644		0.0027322
			0.000693366		0.00291514		0.000170789		0.00104692		0.00574962
			0.0128497		0.00605414		0.000339909		0.00192751		0.0011315
			0.000256316		0.00565025		0.000308957		0.000354464		0.00444401
			0.0033803		0.00130811		0.000210738		0.00100489		0.00557149
			0.00218319		0.00400947		0.000464064		0.0730655		0.00146775
			0.000636329				0.000530133		0.0051035		0.00286779
			0.0019366				0.000625165		0.0275097		0.00263089
			0.0123351				0.001205		0.000180539		0.002688
			0.00389405				0.000203385		0.00177822		0.00252873
			0.000788418				0.000300549		0.00045123		0.00138983
			0.00260849				0.000601341		0.0013516		0.00207844
			0.000888976				0.000780231		0.000455827		0.000598192
			0.00422858				0.000273799		0.000749359		0.00472325
			0.000414048				0.000720539		0.00100066		0.000347249
			0.00904441				0.000375329		0.000596547		0.00170583
							0.000209559		0.000127646		0.000690072
							0.000760024		0.000975568		0.00195288
							0.00054829		0.00386407		0.104312
							0.000152914		0.00081875		0.00211433
							0.000212099		0.00034105		0.00504383
							0.00612381		0.000589071		0.00260736
							0.00920238		0.00412749		0.00244223
							0.00145402		0.000254511		0.00251485
							0.00113322		0.000683358		0.00227967
							0.000950532		0.000756326		0.000406539
							0.000741927				0.00185483
							0.00396337				0.00925051
							0.0150097				0.00493979
							0.00137471				0.00342801
							0.000506539				0.00544615
							0.000963659				0.000465617
							0.00205232				0.000933704
							0.00113676				0.0159998
							0.001427				0.000930817
							0.0470161				0.00325713
							0.000552598
							0.000682749
							0.00541559
							0.00194047
							0.000746995
							0.00183362
							0.000857607
							0.00057803
							0.00387194
							0.00378326
							0.000436735
							0.000286976
							0.00428699
							0.00731308
							0.00932925
							0.0339061
							0.0111318
							0.000625165
Mean	0.0245228		0.00461197		0.0207938		0.00307496		0.00398449		0.00534977
SD	0.00371051		0.000654		0.0455936		0.000729		0.001223		0.00147418
4 vs. 8	0.00750505
4 vs. 12	0.83259											20 vs. 8	0.802988
4 vs. 16	4.92144e-05											20 vs. 12	0.0346254
4 vs. 20	0.00548718											20 vs. 16	0.632177
4 vs. 0	0.0091144											20 vs. 0	0.64334
Spot 116	Actin-79B
	4		8		12		16		20		0
	0.0294158		0.000989361		0.108711		0.00400661		0.00465521		0.0022286
	0.0230991		0.000440382		0.203946		0.00049459		0.000298035		0.00156778
	0.128133		0.000839539		0.392495		0.0054444		0.00040183		0.00160267
	0.0202808		0.00022868		0.00209966		0.000132584		0.0630709		0.00941496
	0.125931		0.000209708		0.000794843		0.000205274		0.0138274		0.00540465
			0.00064046		0.000364237		0.00427098		0.00338036		0.00296054
			0.00112175		0.00545944		0.000154173		0.000141517		0.00144085
			0.00165913		0.00136812		0.000295491		0.00244111		0.00162344
			0.000446131		0.000736063		0.000152711		0.000661434		0.00590638
			0.000901111		0.000362673		0.000245853		0.0240203		0.00460742
			0.000158849		0.000363837		0.0280524		0.0013662		0.00110939
			0.000921048		0.0116177		0.015992		0.0183982		0.0259711
			0.0011596		0.00181916		0.000208158		0.00156317		0.00105011
			0.000568789		0.00101853		0.000318726		0.0026299		0.00104071
			0.00436265		0.00122607		0.000585296		0.00111686		0.000473809
			0.000533625		0.00183571		0.000290984		0.0046675		0.00103118
			0.00554341		0.000217218		0.02392		0.00189794		0.000952462
			0.00415327		0.000173877		0.000556313		0.00457706		0.065037
			0.00263873		0.0194316		0.000918113		0.0108516		0.00311743
			0.00303509		0.00165539		0.0033929		0.00192564		0.000992569
			0.00408681		0.000449193		0.000530032		0.0115162		0.000730557
			0.000697845		0.0112237		0.000100799		0.0114881		0.00155395
			0.000315922		0.00291514		0.00103482		0.00300312		0.00162085
			0.00058473		0.00605414		0.00231287		0.0157269		0.00148418
			0.00253571		0.00565025		0.000288139		0.00843571		0.000849802
			0.00280764		0.00130811		0.000831232		0.0132651		0.00265215
			0.00139184		0.00400947		0.000528325		0.0235975		0.00167433
			0.00138309				0.00067777		0.125719		0.00298106
			0.00152231				0.000268723		0.00362338		0.00159106
			0.000465181				0.00199993		0.00378517		0.000817586
			0.000402178				0.000336212		0.0035098		0.00315321
			0.0029522				0.000417271		0.0181524		0.00910052
			0.00355516				0.00197826		0.0268059		0.00282869
			0.000752733				0.000501516		0.0186031		0.00346284
			0.00170642				0.0802609		0.0318167		0.00419403
			0.0166662				0.000630018		0.000542636		0.00462389
			0.000709789				0.00482337		0.00036348		0.000800625
			0.00114814				0.0543361		0.00486111		0.00156118
			0.000587168				0.0803224		0.000846206		0.0082686
			0.000191328				0.00137471		0.000136124		0.00667015
			0.00171588				0.000506539		0.0235975		0.00189481
							0.000963659		0.000263801		0.05802
							0.00205232		0.00251786
							0.00113676		0.000675816
							0.001427		0.00827981
							0.0470161		0.00362338
							0.000552598		0.00238619
							0.000682749		0.000107061
							0.00541559		0.00270524
							0.00194047		0.00378517
							0.000746995		0.0035098
							0.00183362		0.0181524
							0.000857607		0.00311914
							0.00057803		0.0283738
							0.00387194		0.000661434
							0.00378326		0.0240203
							0.000436735		0.0026299
							0.000286976		0.00301533
							0.00428699		0.0046675
							0.00731308		0.00189794
							0.00932925		0.0108516
							0.0339061
							0.0111318
							0.000625165
Mean	0.0653719		0.00187145		0.0291595		0.007248		0.0104349		0.00614446
SD	0.0056539		0.00272055		0.0844189		0.0016874		0.0018632		0.00132521
4 vs. 8	7.981e-10
4 vs. 12	0.388807											20 vs. 8	0.00435849
4 vs. 16	1.60442e-07											20 vs. 12	0.101641
4 vs. 20	2.6139e-06											20 vs. 16	0.317738
4 vs. 0	3.69875e-07											20 vs. 0	0.201914
Spot 117	ATP synthase subunit β
	4		8		12		16		20		0
	0.0623078		0.297747		0.100753		0.000156651		0.000648649		0.0240103
	0.155351		0.0910936		0.284025		0.000538258		0.00129337		0.000770042
	0.00151718		0.0623078		0.000263001		9.75489e-05		0.000293458		0.0157389
	0.00022522		0.155351		0.000376175		0.000259807		0.00312505		0.000606131
	0.00208899		0.00415327		0.000755446		0.0546649		0.00520183		0.00185817
	0.00087377		0.00263873		0.00324482		0.000225827		0.0011749		0.00116158
	0.142123		0.00303509		0.00168604		7.32178e-05		0.000876924		0.00833094
	0.0934155		0.00408681		0.132297		9.20243e-05		0.000344457		0.00204623
			0.000697845		0.143754		0.0209151		0.111323		0.00106197
			0.000315922		0.00030412		0.00109286		0.149055		0.0130068
			0.00058473		0.191688		0.000403134		0.000830104		0.000620171
			0.00253571		0.0701086		0.000476352		0.000862013		0.00116091
			0.00280764				0.000343809		0.00742156		0.00178802
			0.00139184				0.000858609		0.00107037		0.000363211
			0.00138309				0.000597076		0.0012255		0.00532102
			0.00152231				0.000232391		0.0028996		0.00077568
			0.000465181				6.08337e-05		0.00423984		0.0022215
			0.000402178				0.0012131		0.192032		0.0116258
			0.0029522				0.171458		0.00130276		0.00292064
			0.00355516				0.216636		0.263444		0.000693078
			0.000752733				0.000858609		0.00423984		0.00174661
			0.00170642				0.11988		0.192032
			0.0166662				0.157933		0.149055
			0.000709789
			0.00114814
			0.000587168
			0.000191328
			0.00171588
Mean	0.0572378		0.0236609		0.0774379		0.0325681		0.0475648		0.00465846
SD	0.00662675		0.0637332		0.094726		0.0656016		0.082046		0.00134142
4 vs. 8	0.22008
4 vs. 12	0.608116											20 vs. 8	0.247202
4 vs. 16	0.368293											20 vs. 12	0.339085
4 vs. 20	0.766243											20 vs. 16	0.497153
4 vs. 0	0.000966948											20 vs. 0	0.036465
Spot 118	ATP synthase subunit β
	4		8		12		16		20		0
	0.0309207		0.0625177		0.138519		0.000465933		0.000261312		0.0698022
	0.153491		0.0442301		0.0370511		0.000597076		0.000771349		0.030669
	0.0562039		0.153491		0.069029		0.0009275		0.00125687		0.00038172
	0.0138912		0.00190891		0.0876935		0.00130931		0.00178627		0.00155304
	0.147065		0.0871238		0.00030412		0.00810288		0.0389191		0.00836023
	0.036707		0.109826		0.191688		0.043903		0.023113		0.00940312
					0.0701086		0.000432848		0.095047
							0.187226		0.00405206
							0.139022		0.0239184
							0.105753		0.0478874
							0.043903		0.00915224
							0.187226		0.00980355
									0.106878
									0.00538676
									0.0815202
									0.0529851
									0.095047
Mean	0.0730465		0.0765163		0.0849133		0.0599057		0.0351639		0.0200282
SD	0.0613648		0.0528238		0.0635126		0.0747587		0.0379706		0.0267097
4 vs. 8	0.918476
4 vs. 12	0.739506											20 vs. 8	0.0505577
4 vs. 16	0.715527											20 vs. 12	0.0258544
4 vs. 20	0.0885378											20 vs. 16	0.251162
4 vs. 0	0.0810172											20 vs. 0	0.380936
Spot 80	Stellate protein CG33247
	4		8		12		16		20		0
	0.00765921		0.000166617		0.0839077		0.000672588		0.00559868		0.000765319
	0.00927895		0.00215631		0.138731		0.000375635		0.00146346		0.000460689
	0.0134253		0.169203		0.392736		0.000379068		0.000310312		0.00140721
	0.000285703		0.000983691		0.26091		0.00215679		0.00308807		0.00065731
	0.000409737		0.00434586		0.000204438		0.00212517		0.00147365		0.00214517
	0.00293472		0.000266077		0.000217068		0.000439429		0.00130414		0.00749706
	0.0055469		0.0074556		0.0017875		0.000564966		0.00188385		0.0035658
	0.000829476		0.000690924		0.000770185		0.000218638		0.00844623		0.000895596
	0.000840479		0.00252415		0.0010734		0.00519399		0.00147043		0.00870401
	0.00094922		0.000355461		0.000616155		0.0018304		0.00300142		0.000550392
	0.000230502		0.00045206		0.126962		0.000430432		0.00119152
	0.000448305		0.013802		0.00226842		0.0015548		0.00374086
	0.0154206		0.0107926		0.00113684		0.00347912		0.00342395
	0.000343074		0.0960395		0.000194375		7.91281e-05		0.000556551
	0.000318627		0.000688707		0.158914		0.14778		0.00115198
	0.000746537		0.00109081		0.00249416		0.0622662		0.000712505
	0.035393		0.000363888		0.00520275		0.00194304		0.00138377
	0.000383713		0.00128094		0.00042942		0.00501895		0.0705997
	0.00889015		0.0607199		0.00069786		0.04174		0.00049242
	0.0011				0.00243413		0.000332038		0.000338717
	0.00230499				0.000233161		0.00254072		0.00537542
	0.0753877				0.03171		0.000323465		0.00060012
	0.0018441				0.000328272		0.00029586		0.0242734
	0.000452171				0.111377		0.020779		0.000821241
	0.00118515						0.000669457		0.00494525
	0.000482281						0.00280958		0.014692
	0.00479861						0.181859		0.00577948
	0.00489402						0.280751		0.0399105
	0.000629118						0.0586428
	0.00144718						0.000379068
	0.000891187						0.091327
	0.00108933
	0.000311574
	0.128207
	0.00305397
	0.000569541
	0.000236368
	0.00124226
	0.000920941
	0.000271309
	0.000234317
	0.00679427
	0.00189429
	0.00617122
	0.0277153
	0.0526999
	0.0141615
	0.116059
	0.00567428
	0.00243897
Mean	0.0113899		0.0196515		0.0552223		0.0296438		0.00742963		0.00266486
SD	0.00267218		0.0438435		0.010004		0.0644002		0.0150173		0.00302917
4 vs. 8	0.344928
4 vs. 12	0.00483106											20 vs. 8	0.178278
4 vs. 16	0.0793184											20 vs. 12	0.0235816
4 vs. 20	0.472702											20 vs. 16	0.0802994
4 vs. 0	0.309958											20 vs. 0	0.32983
Spot 81	Stellate protein CG33247
	4		8		12		16		20		0
	0.0118076		0.00021388		0.161386		0.00510534		0.000931137		0.00759683
	0.00218767		0.000267572		0.44712		0.000618238		0.00940723		0.00049357
	0.0110393		0.00505671		0.0790055		0.00392476		0.0178288		0.000825654
	0.00292234		0.000740338		0.00155789		0.000951669		0.0334328		0.00119124
	0.0101675		0.000301531		0.00474986		0.00409309		0.00138836		0.000142267
	0.00740292		0.00024162		0.000522269		0.000375492		0.000523641		0.00721047
	0.000566474		0.000155201		0.0190147		0.00276905		0.0166055		0.00319632
	0.00483086		0.000217789		0.029204		0.00144618		0.00119488		0.00815408
	0.0176531		0.0204485		0.0850101		0.0158981		0.000968621
	0.00138184		0.0026687		0.000414502		0.000954389		0.144688
	0.0164243		0.000112608		0.00059135		0.000429456		0.0324346
	0.00301504		0.0188119		0.00520275		0.00084179		0.000454553
	0.0291663		0.00239593		0.00042942		0.000795221		0.000765744
	0.00011303		0.000986543		0.00069786		0.0127847		0.00473122
	0.012396		0.099008		0.00243413		0.0043347		0.00664271
	0.00019885		0.00111362		0.000233161		0.0030736		0.0889918
	0.0113146		0.00378546		0.03171		0.00350944		0.00503268
	0.00143623				0.000328272		0.100901		0.00155066
	0.00461491				0.111377		0.00419523		0.000171487
	0.000355537						0.109764		0.0345346
	0.00325973						0.0941497		0.0036153
	0.0135032								0.000422372
	0.000528819								0.000471097
	0.00100949								0.000694651
	0.00669955								0.00262677
	0.00460933								0.00024048
	0.00308442								0.000310666
	0.00166647								0.000934783
	0.0349268								0.000368269
	0.0247272								0.000132768
	0.000196179								0.00169008
	0.0626515								0.00047824
	0.000292383
	0.0266889
	0.00360336
	0.0002572
	0.000179444
	0.000618411
	0.000649134
	0.00091362
	0.000351988
	0.0024323
	0.00118654
	8.2155e-05
	0.00517508
	9.3674e-05
	0.0355984
	0.00347108
	0.000991866
	0.00353382
Mean	0.00783953		0.00920741		0.051631		0.0176626		0.0129458		0.0036013
SD	0.00121346		0.0239652		0.0010631		0.0354176		0.0298714		0.00348502
4 vs. 8	0.760062
4 vs. 12	0.00507523											20 vs. 8	0.658473
4 vs. 16	0.0852827											20 vs. 12	0.0575445
4 vs. 20	0.283268											20 vs. 16	0.60376
4 vs. 0	0.333839											20 vs. 0	0.387152
Spot 120	Glutathione-S-transferase
	4		8		12		16		20		0
	0.000854721		0.245458		0.276021		0.00491908		0.0415414		0.108796
	0.0550734		0.0490805		0.0433097		0.00244742		0.000187357		0.00445892
	0.0302995		0.00483551		0.000742723		0.284117		0.000503192		0.0013254
	0.0794179		0.0552655		0.00469461		0.0361828		0.000138992		0.122952
	0.0415819		0.00257805		0.00262369		0.146396		0.00116788		0.107253
			0.239301		0.15127		0.284117		0.000141226		0.00525525
					0.00215905				0.135433		0.0267795
					0.000279532				0.000851752		0.100464
					0.000303975				0.00835805		0.0183519
					0.000800468				0.0236473		0.000190154
					0.00432715				0.000254937		0.000720495
[truncated: 1,409 more rows]
